# Supplementary material for: Vaccine-mediated protection against merbecovirus and sarbecovirus challenge in mice
Source: PubMed Central journal article supplement — bioRxiv. 2023 May 23:2023.05.22.540829. Preprint. [Version 1] doi: 10.1101/2023.05.22.540829 (PMC10245799; doi:10.1101/2023.05.22.540829), 2023-05-23

735

736

737

738

739

740

741

742

743

744

745

746

747 **Supplemental Figure legends:**

748

749

750 **Figure S1. Structural and biophysical characterization of the trivalent SARS-CoV-**

751 **2/SHC014/MERS RBD scNP. (A)** Analytical size exclusion chromatography with a Superose6

752 column showing a homogenous protein nanoparticle at the expected elution volume. **(B)**

753 Negative stain electron microscopy of trivalent RBD scNP. 2D class average is shown on the

754 bottom left and a raw image of a single nanoparticle is shown on the top left. The raw image of  
755 the carbon grid is shown on the right. **(C and D)** Differential scanning fluorimetry of the  
756 individual components and assembled trivalent RBD scNP. Melting temperature is defined as the  
757 inflection temperature ( $T_i$ ) on the 350 nm/330 nm ratio curve.

758

759 **Figure S2. Protective efficacy of monovalent vs trivalent RBD scNP vaccines against**  
760 **MERS-CoV challenge in 2X vaccinated mice.** **(A)** Weight loss following MERS-CoV  
761 intranasal challenge in monovalent, trivalent, and adjuvant-only vaccinated mice. **(B)** Infectious  
762 virus replication in the lung at day 2 post infection. **(C)** Infectious virus replication at day 2 post  
763 infection in nasal turbinates. **(D)** Infectious virus replication at day 4 post infection. A Kruskal-  
764 Wallis test with a Dunn's multiple comparison correction test was used for calculating statistical  
765 significance in all panels. \* $P < 0.05$ , \*\* $P < 0.005$ , \*\*\* $P < 0.0005$ , and \*\*\*\* $P < 0.0001$

766

767 **Figure S3. Immunogenicity of monovalent vs trivalent RBD scNP vaccines in 2X vs 3X**  
768 **vaccinated mice.** **(A)** vaccination schema with monovalent scNP, trivalent scNP, and adjuvant  
769 only (GLA-SE). **(B)** LogAUC IgG binding comparison of 2X (prime-boost) vs 3X (prime-boost-  
770 boost) vaccinated mice with monovalent, trivalent, and adjuvant-only against genetically  
771 divergent RBDs from Group 1 (canineCoV-HuPn). Group 2a (OC43), Group 2b (WIV-1, GZ02,  
772 ZC45, GXP4L, and BANAL-236), Group 2c (MERS-CoV, NL140422, HKU4, and HKU5),  
773 Group 2d (BtKY06), and Group 4 (Porcine deltacoronavirus Haiti).

774

**Figure S1****A**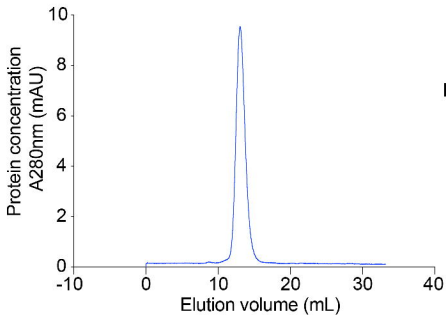**B**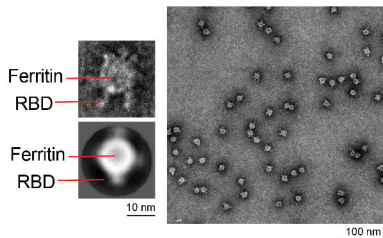**C**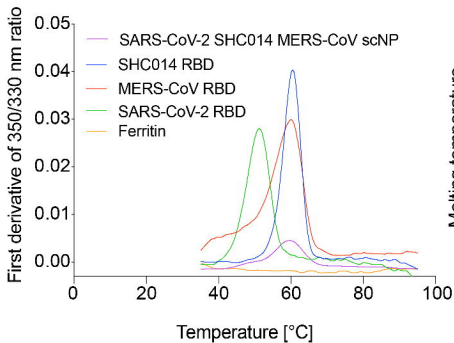**D**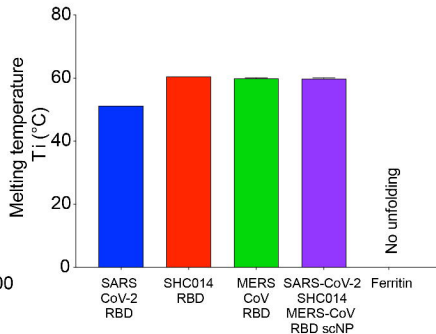

# Figure S2

## MERS-CoV challenge

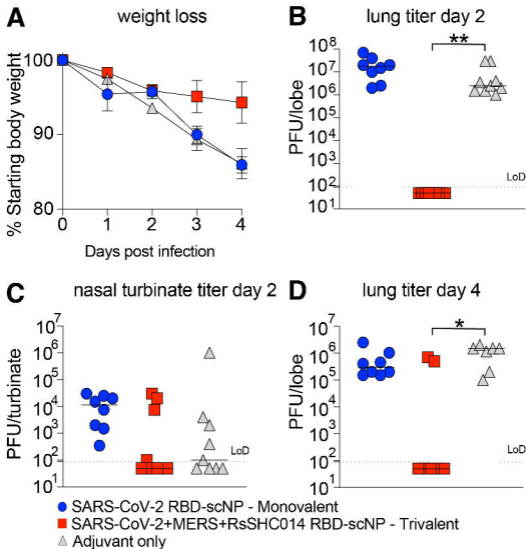

**Figure S3****A**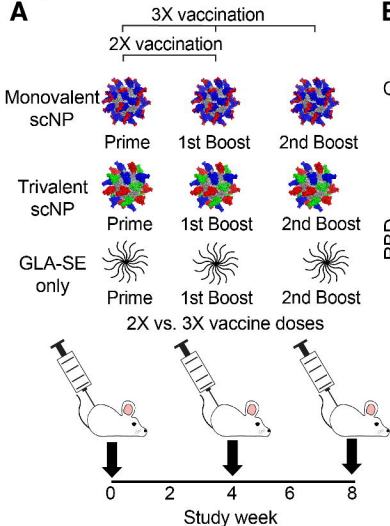**B**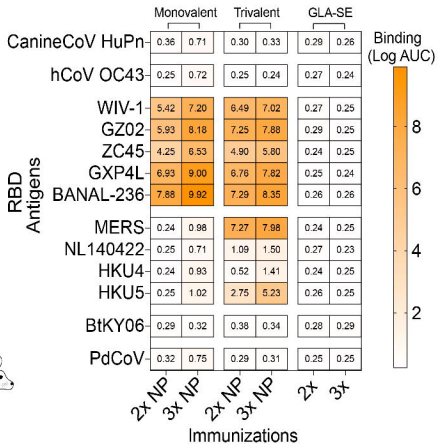

Supplement: NIHPP2023.05.22.540829v1-supplement-1.pdf [file NIHPP2023.05.22.540829v1-supplement-1.pdf]
